1 **Decreased snow cover stimulates under ice primary producers, but**  
2 **impairs methanotrophic capacity**

3 Sarahi L Garcia<sup>a</sup>, Anna J. Szekely<sup>a</sup>, Christoffer Bergvall<sup>a</sup>, Martha Schattenhofer<sup>a,b</sup>, Sari  
4 Peura<sup>a,c,\*</sup>

5 a Department of Ecology and Genetics, Limnology, Uppsala University, Norbyvägen 18 D, 75236  
6 Uppsala, Sweden.

7 b Current address Department of Cell and Molecular Biology, Uppsala University, Husargatan 3, 75124  
8 Uppsala, Sweden

9 c Department of Forest Mycology and Plant Pathology, Science for Life Laboratory, Swedish University  
10 of Agricultural Sciences, Almas allé 5, 75007 Uppsala, Sweden

11 \* For correspondence E-mail sari.peura@slu.se

12

13

14 **Abstract (150 words)**

15

16 Climate change scenarios anticipate decrease of spring snow cover in boreal and subarctic  
17 regions. Forest lakes are abundant in these regions and substantial contributors of methane  
18 emissions. We performed an experiment on an anoxic frozen lake and observed that the  
19 removal of snow increased light penetration through the ice into the water modifying the  
20 microbial composition across depths. A shift in photosynthetic primary production was  
21 reflected by the increase of chlorophyll a and b concentrations in the upper depths of the  
22 water column, while Chlorobia, one of the key photosynthetic bacteria in anoxic lakes, shifted  
23 to lower depths. Moreover, a decrease in abundance of methanotrophs, such as  
24 Methylococcaceae, was noted concurrently to an increase in methane concentration in the  
25 water column. These results indicate that decrease of snow cover impacts both primary  
26 production and methane production/consumption, ultimately leading to increased methane  
27 emissions after spring ice off.

28

29 **Key words:** Snow cover, autotrophy, methanotrophy, light climate, climate change

## 30 Introduction

31 Small forest lakes are a typical feature of the boreal and subarctic region <sup>1</sup>. These small water  
32 bodies with high organic loads are hotspots in the carbon cycle and one of the most  
33 prominent environmental sources of greenhouse gas emissions in these regions <sup>2,3</sup>. The  
34 microorganisms inhabiting such lakes are the main drivers of these biogeochemical  
35 processes <sup>4</sup>. However, the community structure and functioning of microorganisms is bound  
36 to the environmental conditions and seasonality. One very important factor related to  
37 seasonality is light availability. Light is the driving force of primary production at the base of  
38 the food web. Algae provide substrates and oxygen for lake bacteria and are an important  
39 food source of zooplankton. In wintertime, ice cover inhibits oxygen transfer from the  
40 atmosphere into the water column while snow cover impedes light transfer, further curtailing  
41 photosynthesis beneath the ice <sup>5,6</sup>. Moreover, aerobic microorganisms consume residual  
42 oxygen in the water beneath the ice <sup>7</sup>, leading to decreasing oxygen gradient and anoxia from  
43 the lake surface to the bottom. The resulting anoxic conditions facilitate anaerobic processes  
44 like methanogenesis and decrease methanotrophy <sup>8</sup>. These conditions result in methane  
45 accumulation under ice and consequently high methane emissions during ice break-up in the  
46 spring <sup>9,10</sup>. Currently, climate change is altering seasonal patterns in the subarctic region <sup>11</sup>  
47 and also changing patterns of snow cover worldwide <sup>12</sup>. In the northern hemisphere these  
48 changes include sudden extreme conditions, as seen during the 2007/08 winter, when a  
49 sudden loss and reformation of snow cover occurred due to a warming event <sup>13</sup>. Also long  
50 term trends have been observed, such as a decrease in spring snow cover <sup>12</sup>. This project  
51 tests the impact of reduced snow cover on a humic lake ecosystem with the emphasis on  
52 methane cycle and primary producers.

53 We hypothesized that (a) the decrease in snow cover increases light penetration and  
54 stimulates primary production. Furthermore, we hypothesized that more primary production  
55 would (b) increase the availability of oxygen having an impact on aerobic bacteria and (c)  
56 increase methanotrophic activity as an effect of improved oxygen availability. The project was  
57 conducted as a whole lake manipulation in Lake Lomtjärnen (63°20'56.9"N 14°27'28.3"E) a  
58 small boreal lake in central Sweden.

59

## 60 **Results and Discussions**

### 61 *Snow cover removal increased light penetration and its effect on chlorophyll*

62 Our sampling scheme included 6 depths (depth 1 was sampled at 0.65 cm and thereafter  
63 approx. every 40 cm) and 6 time points. We sampled a vertical profile of the lake on three  
64 occasions before the snow removal and three times after; with one day between each  
65 sampling. Thus, the total duration of the experiment was two weeks. Snow depth on the  
66 frozen lake was 18 to 21 cm through the experiment. The snow was removed from  
67 approximately an area of 400 m<sup>2</sup> in the middle of the lake. During the experiment the ice  
68 thickness was approximately 50 cm. Prior to the snow removal, the lake had a shallow  
69 epilimnion, with a steep oxygen depletion layer from 0.6 to 0.7 m, where the oxygen  
70 concentration was close to detection limit (Figure S1).

71 We observed light intensity increase in all depths of the lake after the snow removal (depth 1  
72 from 177 to 3764 lx, depth 2 from 63 to 1378 lux, depth 3 from 39 to 826 lux, depth 4 from 20  
73 to 480 lux, depth 5 from 9 to 299 lux and depth 6 from 0 to 112 lux). Light intensity was  
74 significantly higher only in the first three layers (0.65 m to 1.35 m) (Figure 1). Moreover, the  
75 chlorophyll a concentration increased significantly in those top three layers (0.65 m to 1.35  
76 m), whereas chlorophyll b increased in layers 4 and 5 (1.85 m to 2.53 m). In comparison, the  
77 concentration of bacteriochlorophyll d and e appeared to increase in depth 5 (Figure 1).  
78 Based on these results we presume light had a direct effect on the phytoplankton of the water  
79 column affecting their chlorophyll production and photosynthesis activity and subsequent  
80 oxygen production. After the snow removal an increase in oxygen concentration in the top  
81 layer under the ice was observed which rapidly decreased as time progressed (Figure S1).  
82 However, the differences in oxygen concentration were not statistically significant. This might  
83 indicate that heterotrophic organisms immediately utilized the produced oxygen, which is  
84 supported by the fact that bacterial abundance doubled in the upper layer of the lake (Figure  
85 1).

86

### 87 *Microbial community changes*

88 Against our expectation, snow removal did not have a significant effect on the total community  
89 composition (PERMANOVA:  $p_{DNA} = 0.594$ ,  $p_{RNA} = 0.636$ ). However, when the depths were

90 considered individually, the composition of microbial communities before and after snow  
91 removal were significantly different in depth 1 (0.65 m) and in depth 4 (1.85 m)  
92 (PERMANOVA  $p_{\text{depth1}} = 0.007$  and  $p_{\text{depth4}} = 0.046$ ). Depth was an important driver of  
93 community composition (PERMANOVA,  $p < 0.001$ ), as oxygen concentration and redox  
94 potential are key factors structuring bacterial communities<sup>14,15</sup>. The major microbial groups in  
95 the first depth were Betaproteobacteria (26% before and 32% after snow removal in relative  
96 abundance of DNA-based bacterial community composition, 30% before and 46% after snow  
97 removal in RNA-based community) and Gammaproteobacteria (23% before and 7% after  
98 snow removal in DNA, 37% before and 18% after snow removal in RNA) (Figure 2). Most of  
99 the betaproteobacterial OTUs were classified as Comamonadaceae, while most of the  
100 gammaproteobacterial were classified as Methylococcaceae. Parcubacteria also contributed  
101 to the community change post snow removal in depth 1 (5% before and 10% after snow  
102 removal in DNA, not present in RNA). The major microbial groups in the fourth depth were  
103 Chlorobia (33% before and 17% after snow removal in DNA, 40% before and 28% after snow  
104 removal in RNA), Chloroflexia (12% before and 10% after snow removal in DNA, 13% both  
105 before and after snow removal in RNA) and Anaerolineae (3% before and 4% after snow  
106 removal in both DNA and RNA) (Figure 2). Changes in both DNA and RNA were consequent  
107 in most of the groups in which we observed the biggest alterations post treatment. Overall,  
108 the 11 most abundant OTUs contained each at least 1% of the sequences. Together these 11  
109 OTUs accounted for 32% of the sequences. The most abundant OTU belonged to the  
110 Chlorobiaceae family, while the second and third most abundant OTUs belonged to the  
111 Methylococcaceae family.

112 Because we expected the oxygen conditions to improve the fastest in the top layer of the  
113 water column, we looked into the most abundant families in the first depth. We observed an  
114 increased relative abundance of the family Comamonadaceae (15% to 19% in DNA, 18% to  
115 30% in RNA) and Flavobacteriaceae (10% to 14% in DNA, 5% to 6% in RNA) (Figure 3).  
116 Comamonadaceae and Flavobacteriaceae are both aerobic heterotrophs<sup>16-18</sup>. Both of these  
117 organisms that increased in relative abundance after snow removal could take advantage of  
118 the increased availability of oxygen and organic compounds originating from increased

119 activity of the primary producers, while keeping the oxygen concentration seemingly  
120 unchanged.

121 Chlorobia are photoautotrophic bacteria that are common in boreal lakes such as our study  
122 lake<sup>19-21</sup>. Because of the extraordinarily large numbers of bacteriochlorophylls in their  
123 antenna complexes, some of these green sulfur bacteria are able to grow at extremely low  
124 light irradiances ( $1-10 \text{ nmol photons m}^{-2} \text{ s}^{-1}$ ) under which no other types of chlorophototrophs  
125 can grow<sup>22,23</sup>. It is possible that the decrease in the abundance of Chlorobia in depth 4 after  
126 snow removal was due to light intensity increase, making the conditions more favorable for  
127 organisms using chlorophyll a and b (Figure 1). Moreover, an increase of Chlorobi both in  
128 DNA and RNA relative abundances was observed in depth 5 and 6 of the lake (Figure 3). This  
129 together with the increase in bacteriochlorophyll d and e in depth 5 could mean that  
130 decreased snow cover switches the taxonomical composition of the primary producers of the  
131 lake pushing the optimal conditions for Chlorobia to lower depths of the lake. This shift in  
132 primary producers might have implications for the carbon balance of the lake, following the  
133 possible shifts in efficiency of carbon dioxide uptake and microbial interactions.

134

#### 135 *Methane after snow removal*

136 As expected methane concentration increased with depth, but opposite to our hypothesis  
137 methane concentration was significantly higher after the snow removal (two-way ANOVA  
138  $p_{\text{depth}} < 0.001$ ,  $p_{\text{treatment}} = 0.020$ ) (Figure 1). Most of the gammaproteobacterial organisms  
139 observed in the water column belonged to the family Methylococcaceae, which consists solely  
140 of methane consuming bacteria. Methylococcaceae decreased in relative abundance in DNA  
141 after the treatment on all of the depths except for depth 4 (Figure 3). We also observed a  
142 decreasing trend in phosphate concentration in depths 1, 3, 4 and 5 after the treatment. In a  
143 previous study, low phosphate concentration has been linked to impaired methanotrophic  
144 activity<sup>24</sup>. Considering that many methanotrophs are slow growing<sup>25</sup> and the increased algal  
145 activity in the lake after snow removal, as suggested by the increased chlorophyll  
146 concentrations, it is possible that the methanotrophs were unable to compete for phosphorus  
147 with the phytoplankton. Alternatively, the increased primary production could have contributed  
148 more substrate to methanogenesis in surface sediments, increasing overall the concentration

149 of methane in the water column<sup>10</sup>. Decreased methanotrophy and increased methanogenesis  
150 would explain the increased methane concentrations after the snow removal. In any case,  
151 increased methane concentrations in the water column translate into increased methane  
152 emissions to the atmosphere once the ice melts in the spring.

153

#### 154 *Conclusions*

155 Our results show that the impact of decreased snow cover to the lake microbiome and also to  
156 total lake metabolism is a complex interaction between the biotic and abiotic lake  
157 characteristics. While our first hypothesis (a), the increase of light and stimulation of primary  
158 production following the snow removal proved to be correct, (b) the increase of oxygen and  
159 (c) increase of methanotrophic activity appeared to be false. However, it should be noted that  
160 the duration of our experiment was rather short and it might be possible that on a longer time  
161 scale the oxygen conditions might improve. Nevertheless, we conclude that the final outcome  
162 of the decreased snow cover can be expected to change the total lake metabolism and  
163 potentially increase methane emission after the ice break.

164

#### 165 **Methods**

166 The experiment was conducted in March 2016 on Lake Lomtjärnan (63°20'56.9"N  
167 14°27'28.3"E), a small lake located in Krokomb (Sweden). The lake is located on a mire  
168 surrounded by a coniferous forest and it is ice covered during the winter months,  
169 approximately from November to April. The experiment consisted of two parts; monitoring of  
170 the lake while there was a snow cover over the whole ice and observing the impact snow  
171 cover removal after the snow was removed from an area of approximately 400 m<sup>2</sup> in the  
172 middle of the lake. Snow removal was performed on day 6 manually using snow shovels. For  
173 each sampling a hole was drilled through the ice on a different location to avoid interference  
174 of unnatural ice formation as the holes were always filled and covered with snow to limit  
175 oxygen and light penetration to the water column.

176

177 Light intensity was measured with 18 HOBO loggers with the capacity to measure light  
178 intensity and temperature (HOBO Pendant® Temperature/Light 64K Data Logger, Onset,

179 USA). The loggers were placed under ice from surface to the bottom every 0.1 to 0.75 m on  
180 the first day of the experiment and kept there throughout the experiment. Laterally, the  
181 sensors were approximately 50 cm from the hole in the ice. The light values are presented as  
182 daily averages for the time between sunrise and sunset (approximately 10 AM to 3 PM).

183

184 On each sampling occasion samples were taken for the measurement of chemical  
185 parameters (Chlorophylls, Nitrite, Nitrate, Phosphate, Sulfate, Ammonia, Fluoride, Chloride,  
186 O<sub>2</sub>, CH<sub>4</sub>, CO<sub>2</sub>), and DNA- and RNA-based community analyses. For DNA and RNA the  
187 samples were taken with Sterivex-filters (Millipore, Billerica, MA, USA). For RNA the filtering  
188 was limited to 15 minutes, while for DNA the filtering was continued until the filter was  
189 clogging. Samples were taken from six different depths and on days 1, 3 and 5 (before the  
190 snow removal) and on days 7, 9 and 12 (after the snow removal).

191

192 Chlorophyll pigments were extracted on ice in 2ml 90% acetone using an ultrasonic bath and  
193 left at -20°C overnight. After that, the samples were centrifuged (3000x 10min at 4°C) and  
194 filtrated (0.45µm syringe filters). The extracts were analyzed using HPLC on an Agilent 1100  
195 Series HPLC system (Agilent Technologies, Waldbronn, Germany) fitted with three RP-18e  
196 100x4.6mm Chromolith Performance columns (Merck, Darmstadt, Germany) connected in  
197 series. The flow rate was 1.4ml/min and the gradient program followed as described <sup>26</sup>. The  
198 column temperature was 25°C and the injection volume was 100µl (70µl sample + 30µl 0.5M  
199 ammonium acetate). The absorbance was measured with a diode array detector between  
200 300-800nm (resolution 2nm and slit with 4nm). Chlorophyll a and b were identified and  
201 quantified using standard solutions (DHI Laboratory Products, Hoersholm, Denmark) and the  
202 bacteriochlorophylls by using previously published chromatograms, spectra and extinction  
203 coefficients <sup>27-31</sup>. Methane concentration was analysed as described <sup>32</sup>, except that room air  
204 was used instead of nitrogen for the headspace. The methane concentration was analysed  
205 also from room air and subtracted from the final gas concentrations.

206

207 DNA and RNA was co-extracted using phenol-chloroform method <sup>33</sup> as modified in <sup>21</sup>. RNA  
208 was then transcribed into cDNA as previously described <sup>34</sup> using RevertAid H Minus First

209 Strand cDNA synthesis kit (Thermo Scientific). After this, both, the RNA and DNA samples  
210 were amplified for bacterial 16S rRNA genes using primers 341r and 805f<sup>35</sup>. PCR protocol  
211 was done as previously<sup>36</sup>. The samples were then pooled in equimolar amounts and  
212 sequenced with Illumina MiSeq at Science for Life Laboratories (Uppsala, Sweden). The  
213 resulting 2.5 million sequences were processed using Mothur<sup>37</sup> as described<sup>38</sup>, except that  
214 OTU clustering was done using abundance-based greedy clustering. Raw sequences have  
215 been submitted to ENA under the accession number ERS2597919 - ERS2597988.

216

217 The effect of snow removal and water depth was tested by two-way analyses of variance  
218 (ANOVA) with corresponding Tukey's post-hoc tests for the environmental parameters and by  
219 two-way permutational ANOVA (PERMANOVA) with 9999 permutations for the community  
220 composition data. The normal distribution of the residuals of the ANOVA models was tested  
221 using Shapiro-Wilk normality test and where needed, data was log transformed. All statistical  
222 analyses were done in R version 3.4.3<sup>39</sup>. Packages phyloseq, vegan and ggplot2 were used  
223 <sup>40-42</sup>.

224

#### 225 **Author Contributions**

226 SLG and SP originated the research. SLG, AS, MS, SP participated in the sampling  
227 campaign. SP, AS and CB conducted the laboratory work including DNA, RNA, nutrient, and  
228 chlorophyll analyses. SLG, AS, SP performed the data analysis. All authors contributed to  
229 discussions of data and manuscript review.

230

#### 231 **Acknowledgements**

232 This work was supported by grants from Olsson-Borgh foundation (grant to SP and SLG), the  
233 Academy of Finland (grant 265902 to SP) and the Royal Swedish Academy of Sciences  
234 (grant BS2017-0044). The computations were performed on resources provided by SNIC  
235 through Uppsala Multidisciplinary Center for Advanced Computational Science (UPPMAX)  
236 under Project SNIC 2017/1-616. The authors thank the shoveling team: mainly Zoltan Török,  
237 Philipp Baur and Jussi Peura.

238



239 **Conflict of interest Statement:** The author declares no conflict of interest.

240

## 241 **References**

- 242 1 Sobek, S., Soderback, B., Karlsson, S., Andersson, E. & Brunberg, A. K. A carbon  
243 budget of a small humic lake: An example of the importance of lakes for organic  
244 matter cycling in boreal catchments. *Ambio* **35**, 469-475, doi:10.1579/0044-  
245 7447(2006)35[469:Acboas]2.0.Co;2 (2006).
- 246 2 Algesten, G. *et al.* Role of lakes for organic carbon cycling in the boreal zone. *Global*  
247 *change biology* **10**, 141-147, doi:10.1111/j.1365-2486.2003.00721.x (2004).
- 248 3 Tranvik, L. J. *et al.* Lakes and reservoirs as regulators of carbon cycling and climate.  
249 *Limnology and Oceanography* **54**, 2298-2314, doi:10.4319/lo.2009.54.6\_part\_2.2298 (2009).
- 250 4 Newton, R. J., Jones, S. E., Eiler, A., McMahon, K. D. & Bertilsson, S. A Guide to the  
251 Natural History of Freshwater Lake Bacteria. *Microbiol. Mol. Biol. Rev.* **75**, 14-49,  
252 doi:10.1128/membr.00028-10 (2011).
- 253 5 White, D. M. *et al.* A tool for modeling the winter oxygen depletion rate in arctic lakes.  
254 *J Am Water Resour As* **44**, 293-304, doi:10.1111/i.1752-1688.2007.00162.x (2008).
- 255 6 Clilverd, H., White, D. & Lilly, M. Chemical and Physical Controls on the Oxygen  
256 Regime of Ice-Covered Arctic Lakes and Reservoirs. *J Am Water Resour As* **45**, 500-  
257 511, doi:10.1111/j.1752-1688.2009.00305.x (2009).
- 258 7 Bellido, J. L., Tulonen, T., Kankaala, P. & Ojala, A. CO<sub>2</sub> and CH<sub>4</sub> fluxes during spring  
259 and autumn mixing periods in a boreal lake (Paajarvi, southern Finland). *J Geophys*  
260 *Res-Bioge* **114**, doi:Artn G04007  
261 10.1029/2009jg000923 (2009).
- 262 8 Dunfield, P., Knowles, R., Dumont, R. & Moore, T. R. Methane Production and  
263 Consumption in Temperate and Sub-Arctic Peat Soils - Response to Temperature  
264 and Ph. *Soil Biol Biochem* **25**, 321-326, doi:10.1016/0038-0717(93)90130-4  
265 (1993).
- 266 9 Smith, L. K. & Lewis, W. M. Seasonality of Methane Emissions from Five Lakes and  
267 Associated Wetlands of the Colorado Rockies. *Global Biogeochem Cy* **6**, 323-338,  
268 doi:10.1029/92gb02016 (1992).
- 269 10 Sepulveda-Jauregui, A., Anthony, K. M. W., Martinez-Cruz, K., Greene, S. &  
270 Thalasso, F. Methane and carbon dioxide emissions from 40 lakes along a north-  
271 south latitudinal transect in Alaska. *Biogeosciences* **12**, 3197-3223, doi:10.5194/bg-  
272 12-3197-2015 (2015).
- 273 11 Callaghan, T. V. *et al.* A new climate era in the sub-Arctic: Accelerating climate  
274 changes and multiple impacts. *Geophys Res Lett* **37**, doi:Artn L14705  
275 10.1029/2009gl042064 (2010).
- 276 12 Brown, R. D. & Mote, P. W. The Response of Northern Hemisphere Snow Cover to a  
277 Changing Climate. *J Climate* **22**, 2124-2145, doi:10.1175/2008jcli2665.1 (2009).
- 278 13 Bokhorst, S. F., Bjerke, J. W., Tommervik, H., Callaghan, T. V. & Phoenix, G. K.  
279 Winter warming events damage sub-Arctic vegetation: consistent evidence from an  
280 experimental manipulation and a natural event. *J Ecol* **97**, 1408-1415,  
281 doi:10.1111/j.1365-2745.2009.01554.x (2009).
- 282 14 Garcia, S. L., Salka, I., Grossart, H.-P. & Warnecke, F. Depth-discrete profiles of  
283 bacterial communities reveal pronounced spatio-temporal dynamics related to lake  
284 stratification. *Environmental Microbiology Reports* **5**, 549-555, doi:10.1111/1758-  
285 2229.12044 (2013).
- 286 15 Peura, S., Sinclair, L., Bertilsson, S. & Eiler, A. Metagenomic insights into strategies  
287 of aerobic and anaerobic carbon and nitrogen transformation in boreal lakes.  
288 *Scientific reports* **5**, doi:ARTN 12102  
289 10.1038/srep12102 (2015).
- 290 16 Hahn, M. W. *et al.* *Limnohabitans curvus* gen. nov., sp nov., a planktonic bacterium  
291 isolated from a freshwater lake. *International Journal of Systematic and Evolutionary*  
292 *Microbiology* **60**, 1358-1365, doi:10.1099/ijs.0.013292-0 (2010).
- 293 17 Willems, A., De Ley, J., Gillis, M. & Kersters, K. Comamonadaceae, a New Family  
294 Encompassing the Acidovorans rRNA Complex, Including *Variovorax paradoxus* gen.  
295

- 296 nov. , comb. nov. for *Alcaligenes paradoxus* (Davis 1969) *International Journal of*  
297 *Systematic Bacteriology*, 445-450.
- 298 18 O'Sullivan, L. A., Rinna, J., Humphreys, G., Weightman, A. J. & Fry, J. C. Culturable  
299 phylogenetic diversity of the phylum 'Bacteroidetes' from river epilithon and coastal  
300 water and description of novel members of the family Flavobacteriaceae :  
301 *Epilithonimonas tenax* gen. nov., sp nov and *Persicivirga xylanidelens* gen. nov., sp  
302 nov. *International Journal of Systematic and Evolutionary Microbiology* **56**, 169-180,  
303 doi:10.1099/ijs.0.63941-0 (2006).
- 304 19 Karhunen, J., Arvola, L., Peura, S. & Tirola, M. Green sulphur bacteria as a  
305 component of the photosynthetic plankton community in small dimictic humic lakes  
306 with an anoxic hypolimnion. *Aquatic Microbial Ecology* **68**, 267-+,  
307 doi:10.3354/ame01620 (2013).
- 308 20 Peura, S. *et al.* Distinct and diverse anaerobic bacterial communities in boreal lakes  
309 dominated by candidate division OD1. *Isme Journal* **6**, 1640-1652,  
310 doi:10.1038/ismej.2012.21 (2012).
- 311 21 Taipale, S., Jones, R. I. & Tirola, M. Vertical diversity of bacteria in an oxygen-  
312 stratified humic lake, evaluated using DNA and phospholipid analyses. *Aquatic*  
313 *Microbial Ecology* **55**, 1-16, doi:10.3354/ame01277 (2009).
- 314 22 Beatty, J. T. *et al.* An obligately photosynthetic bacterial anaerobe from a deep-sea  
315 hydrothermal vent. *Proceedings of the National Academy of Sciences of the United*  
316 *States of America* **102**, 9306-9310, doi:10.1073/pnas.0503674102 (2005).
- 317 23 Olson, J. M. Chlorophyll organization and function in green photosynthetic bacteria.  
318 *Photochem Photobiol* **67**, 61-75, doi:DOI 10.1111/j.1751-1097.1998.tb05166.x  
319 (1998).
- 320 24 Denfeld, B. A. *et al.* Constraints on methane oxidation in ice-covered boreal lakes. *J*  
321 *Geophys Res-Biogeo* **121**, 1924-1933, doi:10.1002/2016jg003382 (2016).
- 322 25 Krueger, M., Wolters, H., Gehre, M., Joye, S. B. & Richnow, H. H. Tracing the slow  
323 growth of anaerobic methane-oxidizing communities by N-15-labelling techniques.  
324 *Fems Microbiology Ecology* **63**, 401-411, doi:10.1111/j.1574-6941.2007.00431.x  
325 (2008).
- 326 26 Airs, R. L., Atkinson, J. E. & Keely, B. J. Development and application of a high  
327 resolution liquid chromatographic method for the analysis of complex pigment  
328 distributions. *J Chromatogr A* **917**, 167-177, doi:Doi 10.1016/S0021-9673(01)00663-X  
329 (2001).
- 330 27 Borrego, C. M. *et al.* Distribution of bacteriochlorophyll homologs in natural  
331 populations of brown-colored phototrophic sulfur bacteria. *Fems Microbiology*  
332 *Ecology* **24**, 301-309, doi:DOI 10.1111/j.1574-6941.1997.tb00447.x (1997).
- 333 28 Borrego, C. M., Garcia-Gil, J., Cristina, X. P., Vila, X. & Abella, C. A. Occurrence of  
334 new bacteriochlorophyll d forms in natural populations of green photosynthetic sulfur  
335 bacteria. *Fems Microbiology Ecology* **26**, 257-267, doi:DOI 10.1111/j.1574-  
336 6941.1998.tb00510.x (1998).
- 337 29 Picazo, A., Rochera, C., Vicente, E., Miracle, M. R. & Camacho, A.  
338 Spectrophotometric methods for the determination of photosynthetic pigments in  
339 stratified lakes: a critical analysis based on comparisons with HPLC determinations in  
340 a model lake. *Limnetica* **32**, 139-157 (2013).
- 341 30 Hurley, J. P. & Watras, C. J. Identification of Bacteriochlorophylls in Lakes Via  
342 Reverse-Phase Hplc. *Limnology and Oceanography* **36**, 307-315, doi:DOI  
343 10.4319/lo.1991.36.2.0307 (1991).
- 344 31 Borrego, C. M., Arellano, J. B., Abella, C. A., Gillbro, T. & Garcia-Gil, J. The molar  
345 extinction coefficient of bacteriochlorophyll e and the pigment stoichiometry in  
346 *Chlorobium phaeobacteroides*. *Photosynthesis research* **60**, 257-264, doi:Doi  
347 10.1023/A:1006230820007 (1999).
- 348 32 Kankaala, P., Taipale, S., Nykanen, H. & Jones, R. I. Oxidation, efflux, and isotopic  
349 fractionation of methane during autumnal turnover in a polyhumic, boreal lake. *J*  
350 *Geophys Res-Biogeo* **112**, doi:Artn G02003  
351 10.1029/2006jg000336 (2007).
- 352 33 Griffiths, R. I., Whiteley, A. S., O'Donnell, A. G. & Bailey, M. J. Rapid method for  
353 coextraction of DNA and RNA from natural environments for analysis of ribosomal  
354 DNA- and rRNA-based microbial community composition. *Applied and Environmental*  
355 *Microbiology* **66**, 5488-5491, doi:Doi 10.1128/Aem.66.12.5488-5491.2000 (2000).

- 356 34 Szekely, A. J., Berga, M. & Langenheder, S. Mechanisms determining the fate of  
357 dispersed bacterial communities in new environments. *Isme Journal* **7**, 61-71,  
358 doi:10.1038/ismej.2012.80 (2013).
- 359 35 Herlemann, D. P. R. *et al.* Transitions in bacterial communities along the  
360 2000[thinsp]km salinity gradient of the Baltic Sea. *ISME J* **5**, 1571-1579,  
361 doi:http://www.nature.com/ismej/journal/v5/n10/supinfo/ismej2011  
362 41s1.html (2011).
- 363 36 Sinclair, L., Osman, O. A., Bertilsson, S. & Eiler, A. Microbial Community Composition  
364 and Diversity via 16S rRNA Gene Amplicons: Evaluating the Illumina Platform. *Plos*  
365 *One* **10**, doi:ARTN e0116955  
366 10.1371/journal.pone.0116955 (2015).
- 367 37 Schloss, P. D. *et al.* Introducing mothur: Open-Source, Platform-Independent,  
368 Community-Supported Software for Describing and Comparing Microbial  
369 Communities. *Applied And Environmental Microbiology* **75**, 7537-7541,  
370 doi:10.1128/aem.01541-09 (2009).
- 371 38 Kozich, J. J., Westcott, S. L., Baxter, N. T., Highlander, S. K. & Schloss, P. D.  
372 Development of a Dual-Index Sequencing Strategy and Curation Pipeline for  
373 Analyzing Amplicon Sequence Data on the MiSeq Illumina Sequencing Platform.  
374 *Applied and Environmental Microbiology* **79**, 5112-5120, doi:10.1128/Aem.01043-13  
375 (2013).
- 376 39 Team, R. C. *R: A language and environment for statistical*  
377 *computing.*, <<http://www.R-project.org/>> (2014).
- 378 40 McMurdie, P. J. & Holmes, S. phyloseq: An R Package for Reproducible Interactive  
379 Analysis and Graphics of Microbiome Census Data. *Plos One* **8**, doi:ARTN e61217  
380 10.1371/journal.pone.0061217 (2013).
- 381 41 Dixon, P. VEGAN, a package of R functions for community ecology. *J Veg Sci* **14**,  
382 927-930, doi:DOI 10.1111/j.1654-1103.2003.tb02228.x (2003).
- 383 42 Ginestet, C. ggplot2: Elegant Graphics for Data Analysis. *J R Stat Soc a Stat* **174**,  
384 245-245, doi:DOI 10.1111/j.1467-985X.2010.00676\_9.x (2011).
- 385  
386

387

## 388 **Figure Legends**

389 **Figure 1** Chemical and physical parameters of the lake before (grey) and after snow removal  
390 (white). Depth 1 = 0.65 m, 2 = 1.0 m, 3 = 1.35 m, 4 = 1.85 m, 5 = 2.4 m, 6 = 2.7 m

391 **Figure 2** Relative abundance of microbial communities of each of the samples. Color coded  
392 according to taxonomical class. In the x axis 1 = 100%. Numbers in upper boxes represent  
393 the depth number (1 = 0.65 m, 2 = 1.0 m, 3 = 1.35 m, 4 = 1.85 m, 5 = 2.4 m, 6 = 2.7 m). Bars  
394 inside each box are ordered according to time being the first bar the time 1 and the last bar  
395 time 6. First bar in depth 6 is missing as on the first day of sampling we could not obtain a  
396 sample for depth 6.

397 **Figure 3** Relative abundance of some specific taxonomical groups. Samples taken before the  
398 snow removal are in grey and after snow removal in white. In the x axis 1 = 100%. Numbers  
399 in depth number; 1 = 0.65 m, 2 = 1.0 m, 3 = 1.35 m, 4 = 1.85 m, 5 = 2.4 m, 6 = 2.7 m.

400

401 **Supplementary Figure S1.** Oxygen concentration in the water column across the experiment  
402 in the sampling depths.  
403

Mean oxygen by depth

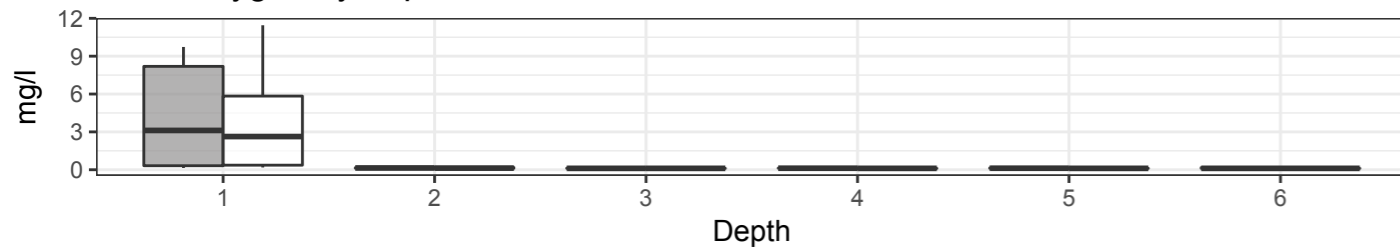

Mean bacteriochlorophyll d by depth

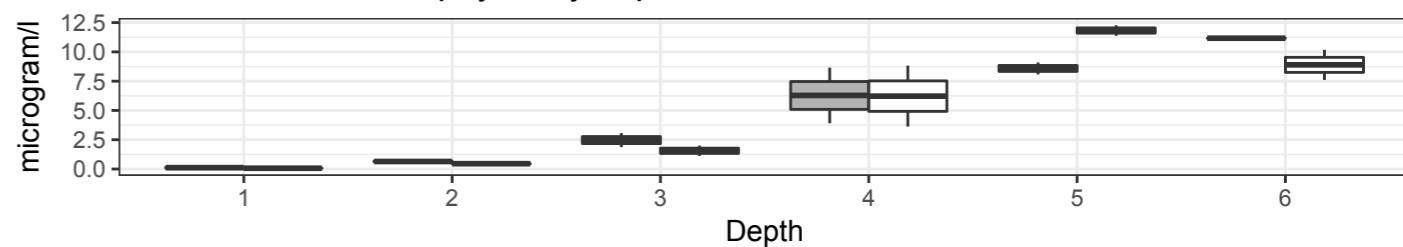

Mean light by depth

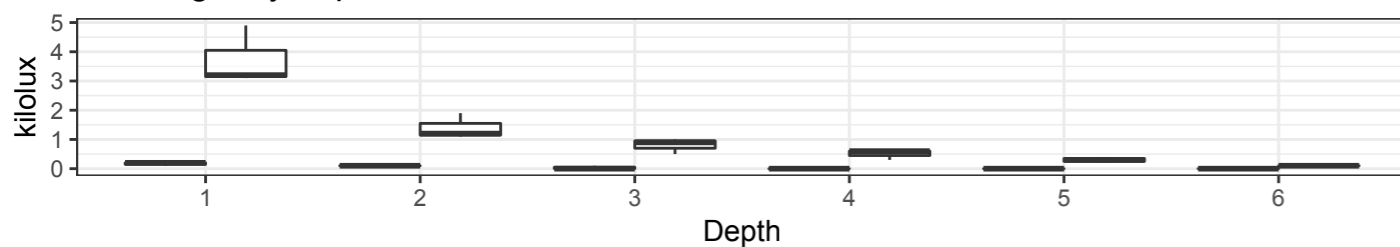

Mean bacteriochlorophyll e by depth

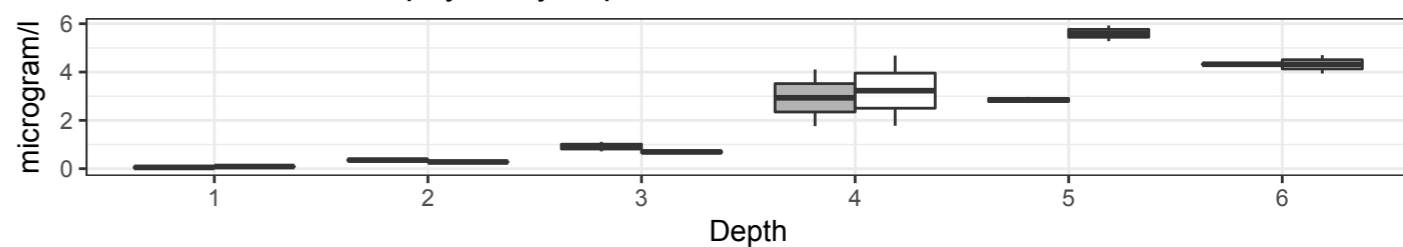

Mean temperature by depth

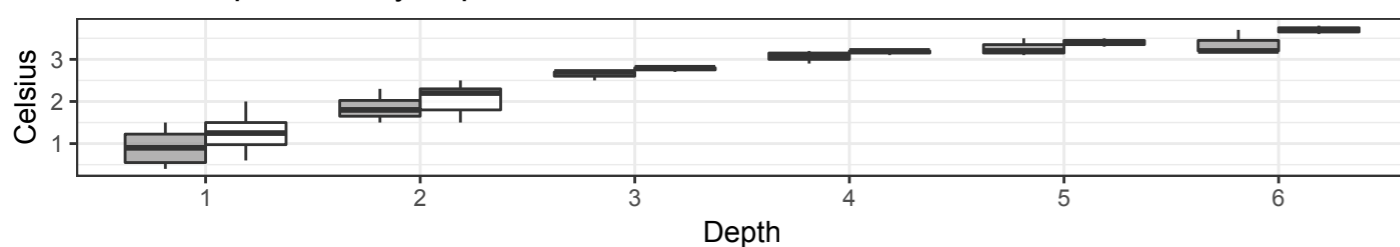

Mean methane by depth

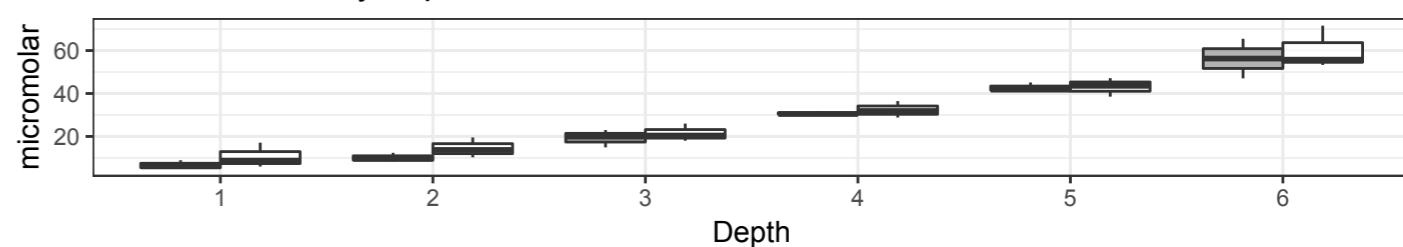

Mean chlorophyll a by depth

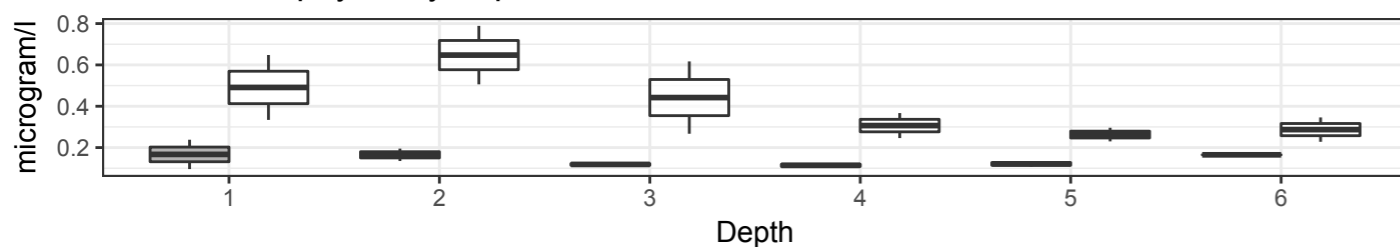

Mean phosphate concentration by depth

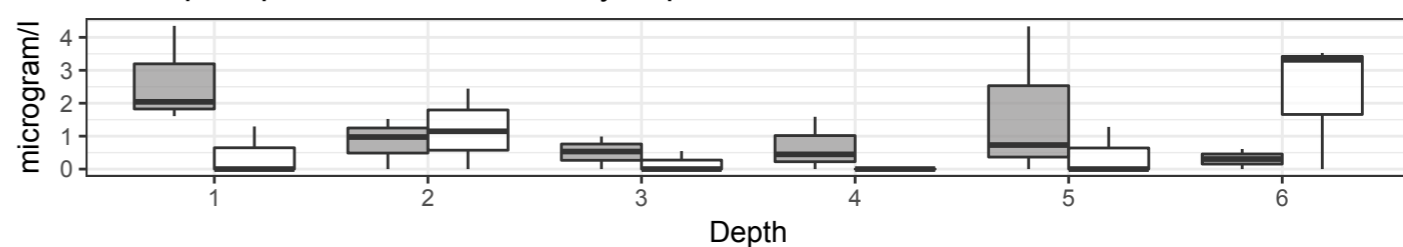

Mean chlorophyll b by depth

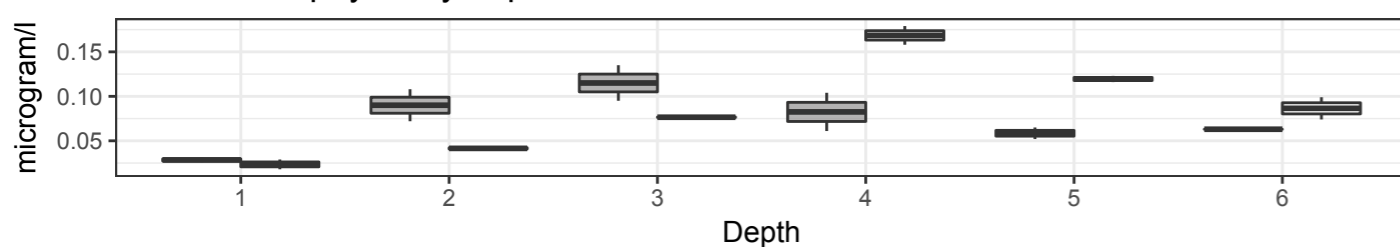

Mean bacterial abundance by depth

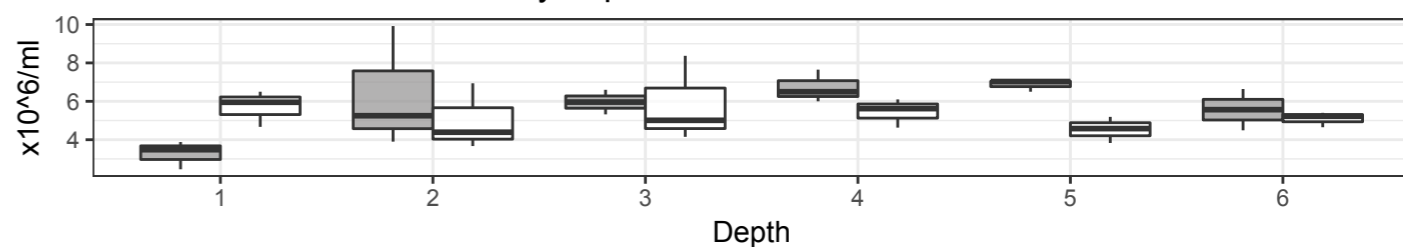

# Class Composition of Lake Lomtjaernen Bacterial Communities Grouped by Depth

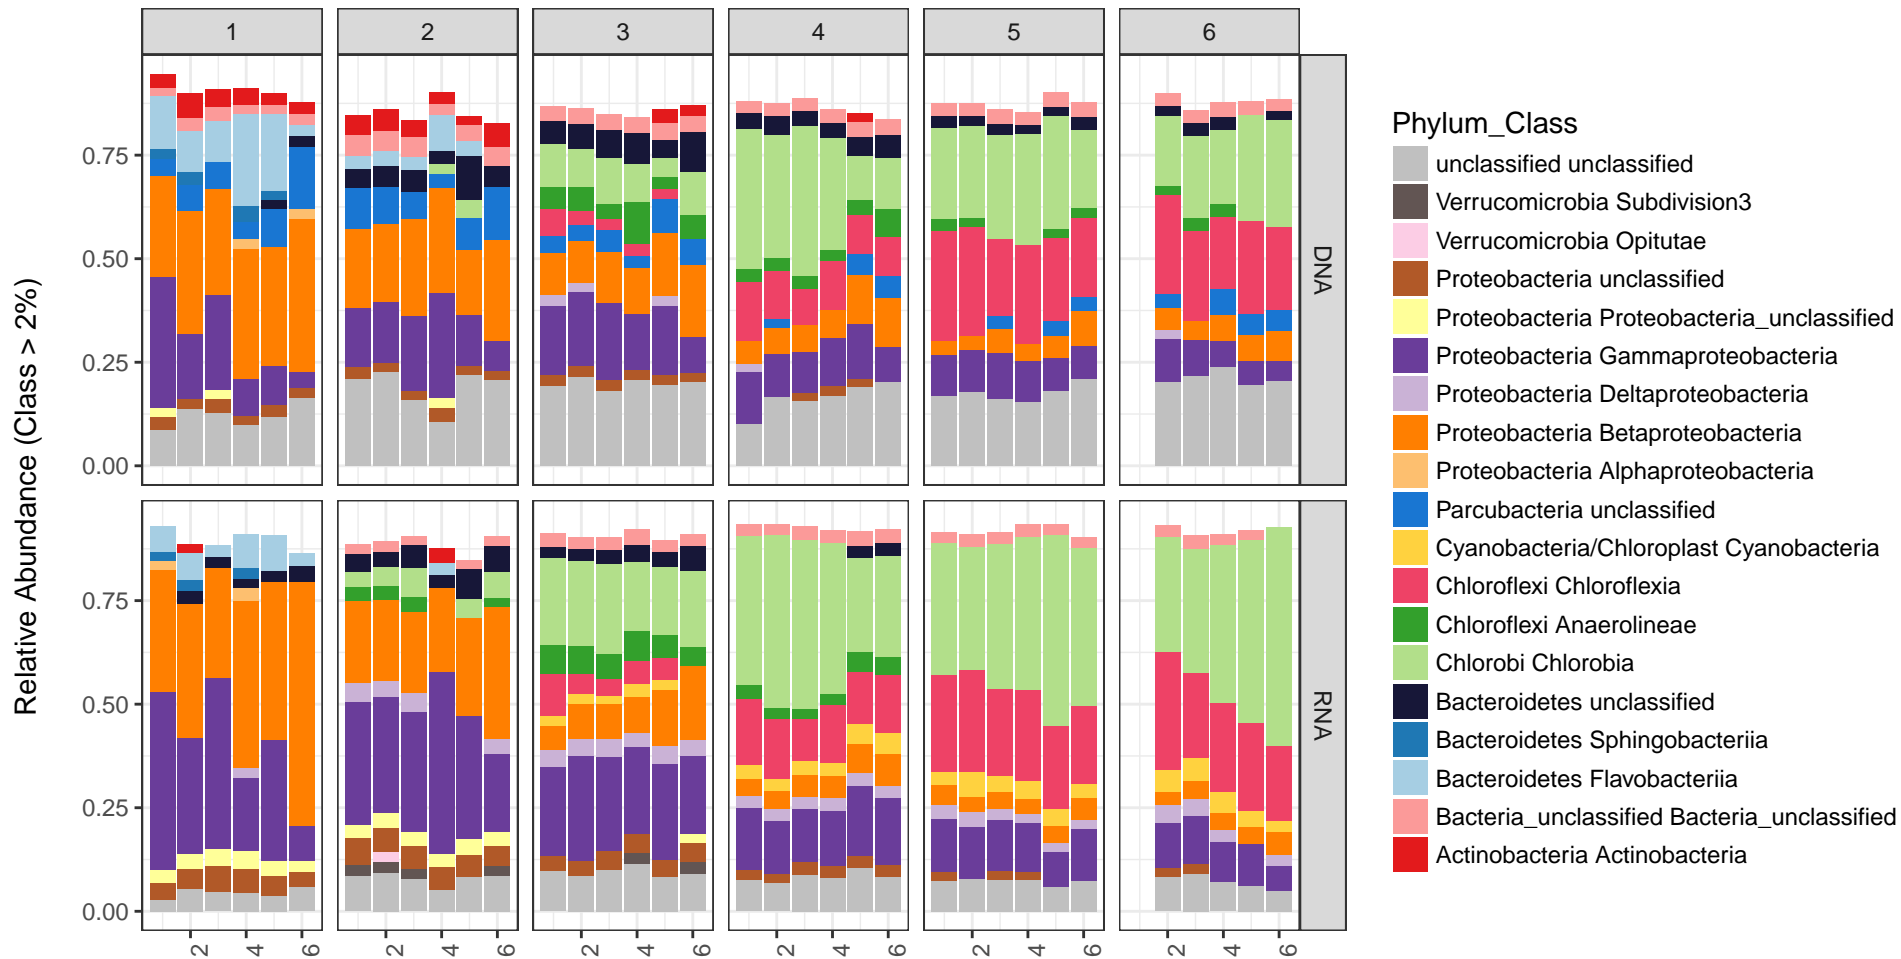

Mean relative abundance of Comamonadaceae in DNA by depth

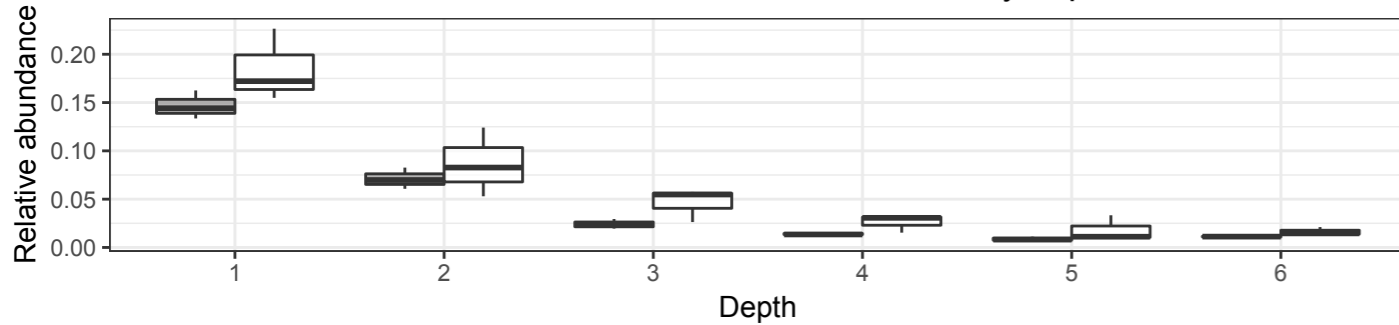

Mean relative abundance of Comamonadaceae in RNA by depth

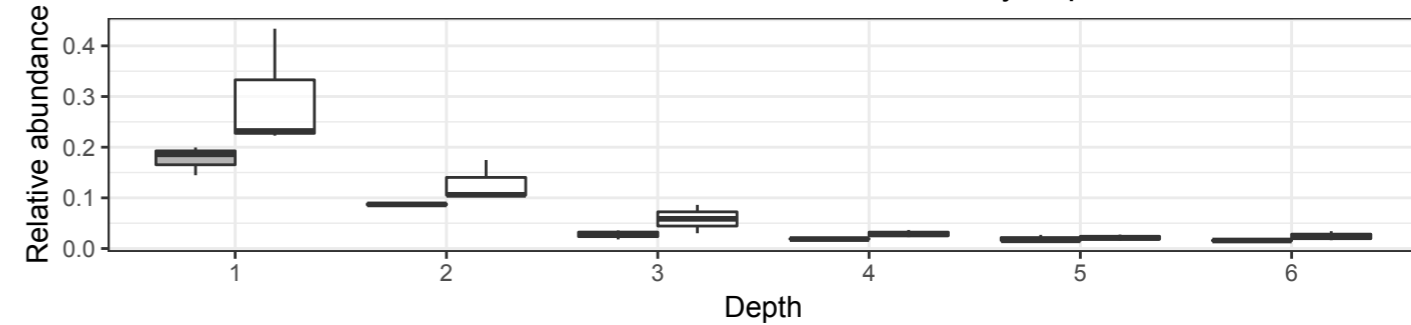

Mean relative abundance of Flavobacteriaceae in DNA by depth

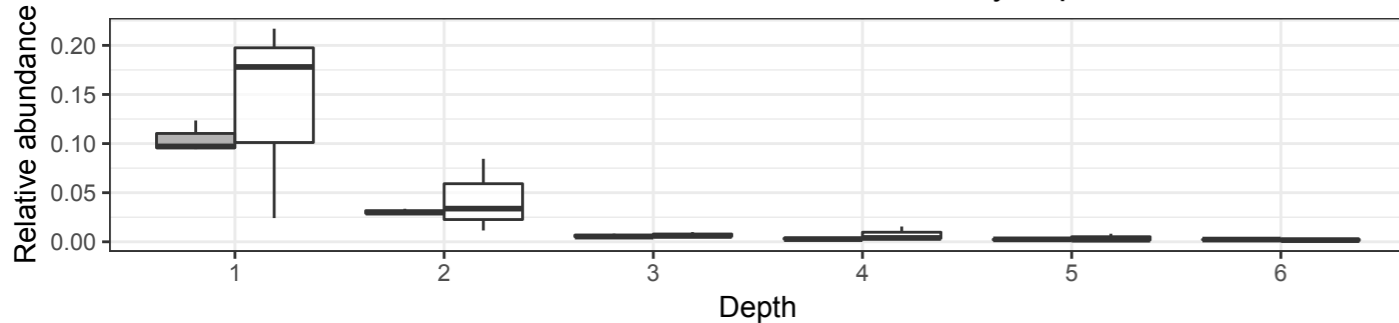

Mean relative abundance of Flavobacteriaceae in RNA by depth

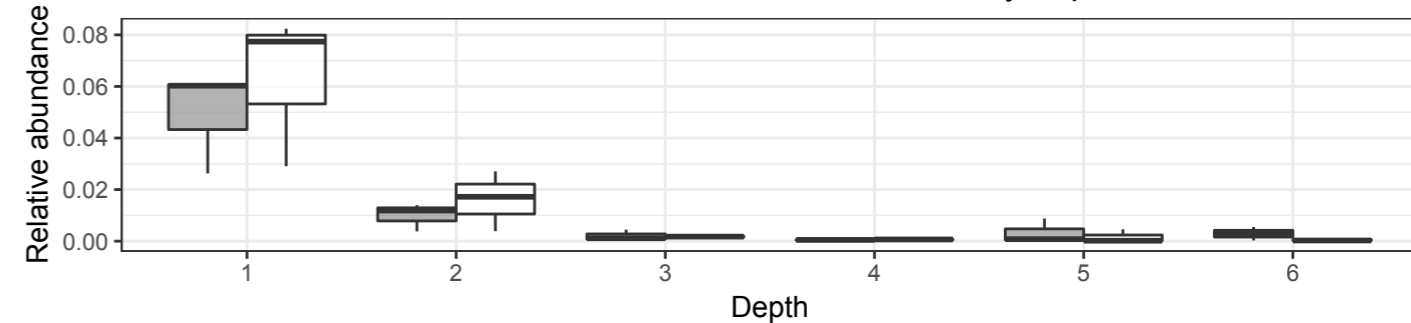

Mean relative abundance of Chlorobiaceae in DNA by depth

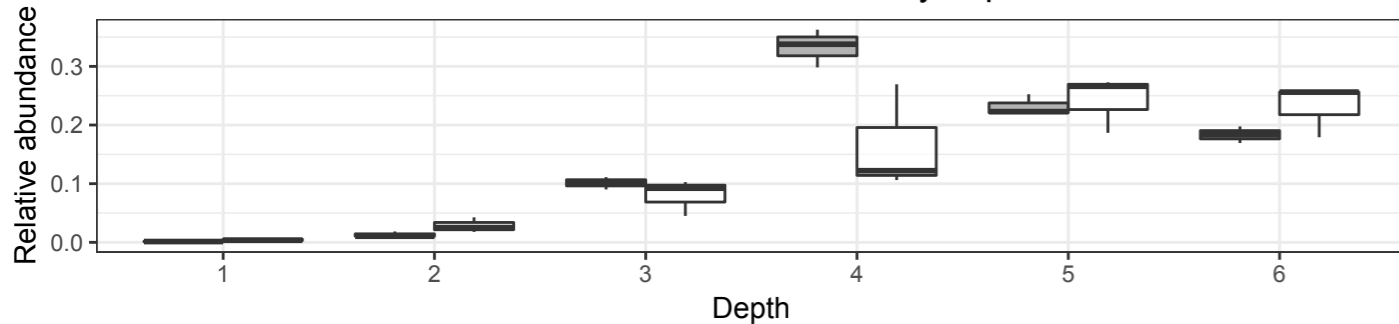

Mean relative abundance of Chlorobiaceae in RNA by depth

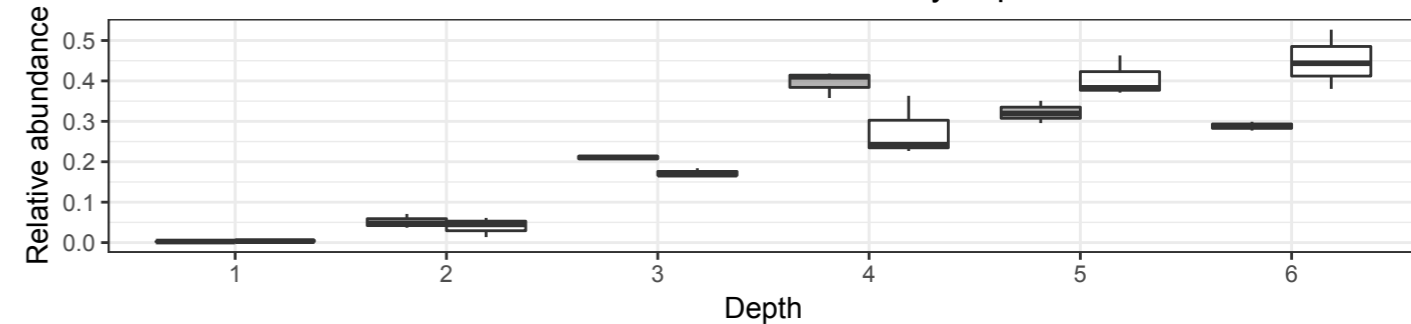

Mean relative abundance of Methylococcaceae in DNA by depth

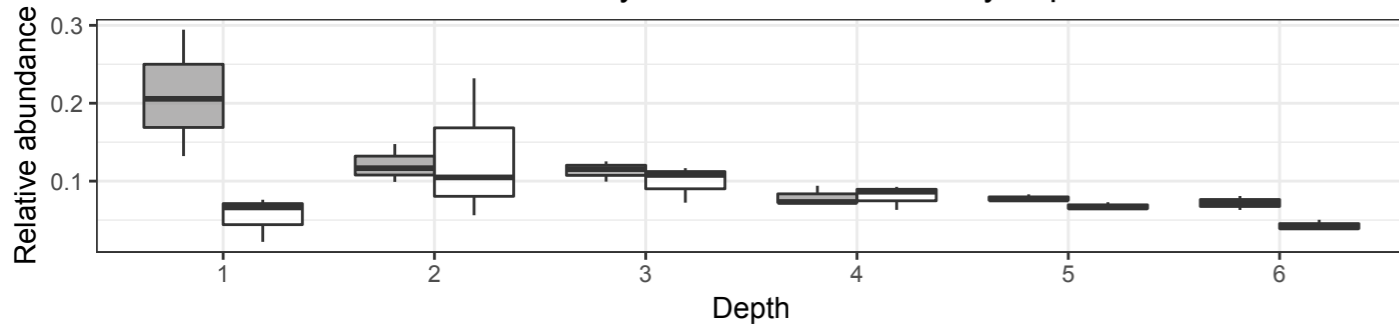

Mean relative abundance of Methylococcaceae in RNA by depth

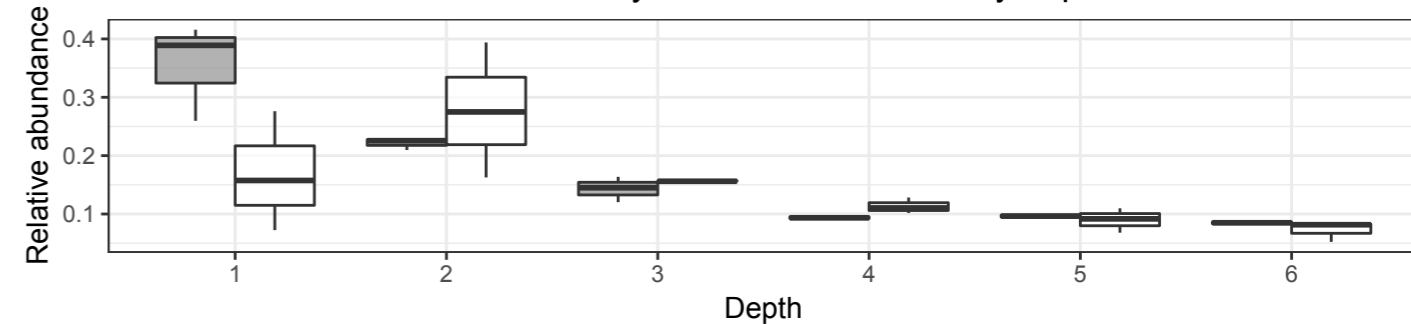

Source: http://biorxiv.org/content/10.1101/380170v1.full.pdf
